# Supplementary material for: Reverse relationships of water uptake and alkaline durability with hydrophilicity of imidazolium-based grafted anion-exchange membranes
Source: Royal Society of Chemistry journal article supplement (doi:10.1039/c8sm01650j), 2018-01-01
Supplement: c8sm01650j1.pdf [file c8sm01650j1.pdf]

### S1. Theoretical calculation for the scattering length density (SLD) of a molecule.

Theoretically, the SLD of a molecule is computable via its molecular structure and mass density. Thus,  $b_{\text{graft}} = 1.234, 1.307$  and  $1.342 (\times 10^{10} \text{ cm}^{-2})$  for each AEM are estimated as listed in Table 2.<sup>52</sup> The exact mass density of either ETFE crystalline or amorphous chain is unknown; however, plenty of previous reports showed that the scattering intensity of the neat ETFE base films is very weak, suggesting a negligible small difference in the SLD of ETFE crystalline and amorphous domains.<sup>14, 16, 50</sup> Therefore, it is reasonable to use the average mass density of ETFE film of  $1.7 \text{ g/cm}^3$  to roughly estimate the SLD of ETFE crystalline and amorphous domains to be  $2.7 \times 10^{10} \text{ cm}^{-2}$  as listed in Table 2.  $b_w$  is a function of  $f_{D2O}$  given by

$$b_w = b_{D2O}f_{D2O} + b_{H2O}(1 - f_{D2O}) \quad (\text{S1})$$

where  $b_{D2O}$  and  $b_{H2O}$  are the SLD of  $D_2O$  and  $H_2O$  being  $6.34$  and  $-0.56 (\times 10^{10} \text{ cm}^{-2})$ , respectively.<sup>52</sup>

**S2. Hard-Sphere fluid model analysis.** For the identical spheres,  $P(q)$  is expressed as a functions of an average radius ( $R_s$ ) and the standard deviation of  $R_s$  ( $\sigma_R$ ) as below.

$$P(q) = v^2 \left\{ \frac{3[\sin(qR_s) - qR_s \cos(qR_s)]}{(qR_s)^3} \right\}^2 \quad (\text{S2})$$

with  $v$  being the volume of the sphere as  $v = (4\pi R_s^3)/3$ . For spheres with a size distribution, Gaussian distribution function is applied to modify  $P(q)$  as<sup>52</sup>

$$P(q) = \int_0^{\infty} v^2 \left\{ \frac{3}{(qr)^3} [\sin(qr) - qrcos(qr)] \right\}^2 \times \frac{1}{(2\pi)^{1/2} \sigma_R} \exp\left[-\frac{(r - R_s)^2}{2\sigma_R^2}\right] dr \quad (\text{S3})$$

where  $\sigma_R$  is the standard deviation of  $R_s$ .

Given that Percus–Yevick approximation accounts for the inter-particle interference,  $S(q)$  is expressed as a function of the volume fraction of spheres ( $\phi_s$ ) and  $R_s$ .<sup>53-55</sup>

$$S(q) = \frac{1}{1 + 24\phi_s \left(\frac{F(A)}{A}\right)} \quad (\text{S4})$$

where  $A = 2qR_s$ ,  $\phi_s$  is the volume fraction of spheres in the conducting domains, and  $F(A)$  is a trigonometric function of  $A$  by

$$F(A) = \frac{\alpha}{A^2}(\sin A - A \cos A) + \frac{\beta}{A^3}(2A \sin A + (2 - A^2) \cos A - 2) + \frac{\gamma}{A^5}(-A^4 \cos A + 4A^3 \sin A - 6A^2 \cos A + 6A \sin A - 6 \cos A + 6) \quad (\text{S5})$$

where

$$\begin{aligned} \alpha &= (1 + 2\phi_s)^2 / (1 - \phi_s)^4 \\ \beta &= -6\phi_s \left(1 + \frac{\phi_s}{2}\right)^2 / (1 - \phi_s)^4 \\ \gamma &= \frac{1}{2\phi_s} (1 + 2\phi_s)^2 / (1 - \phi_s)^4 \end{aligned} \quad (\text{S6})$$

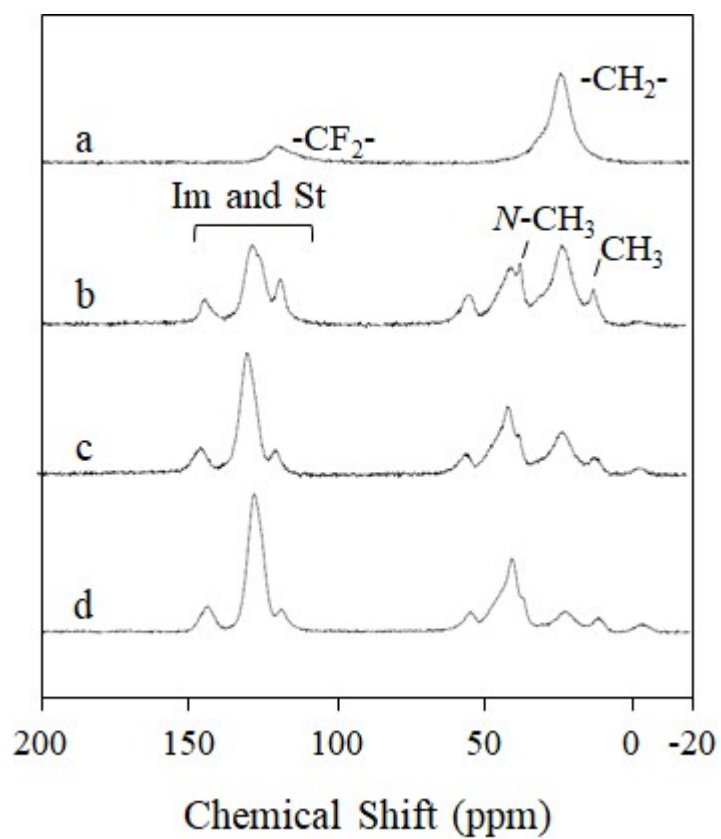

Figure S1  $^{13}\text{C}$  solid-state NMR spectra of (a) a ETFE base film, and (b)  $\text{Im}_6\text{St}_4^-$ , (c)  $\text{Im}_4\text{St}_6^-$ , (d)  $\text{Im}_3\text{St}_7^-$  AEMs in the  $\text{Cl}^-$  form.

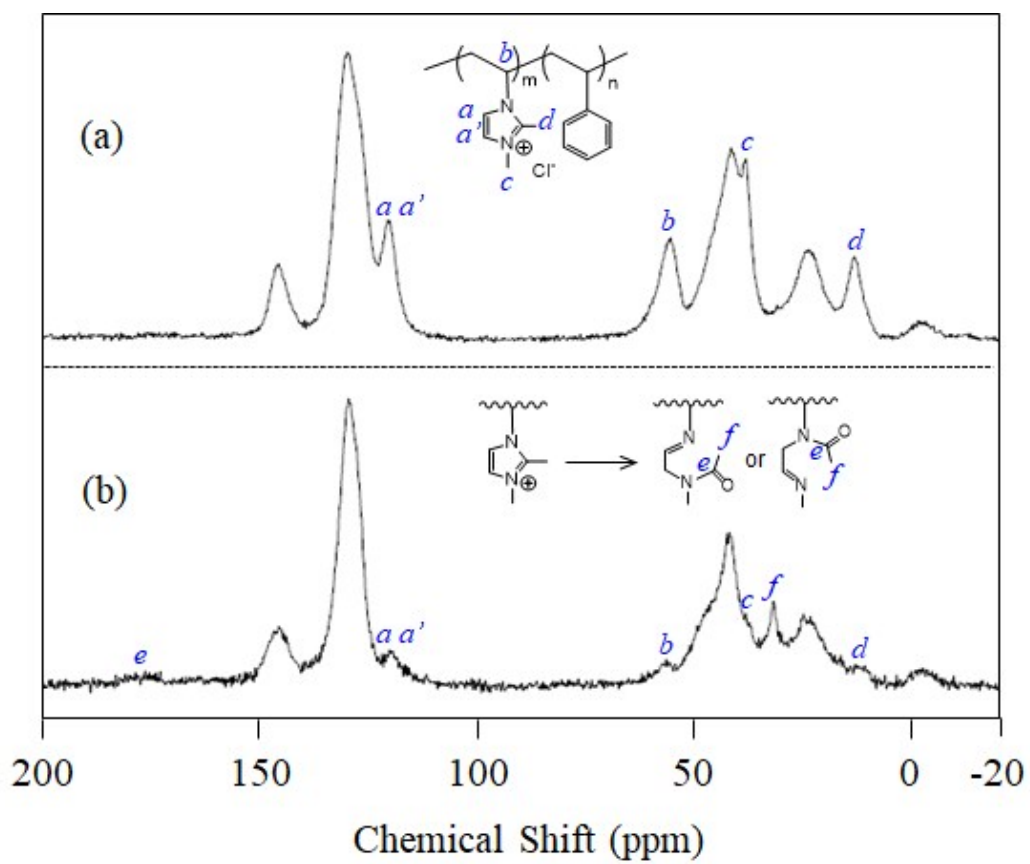

Figure S2  $^{13}\text{C}$  solid-state NMR spectra of  $\text{Im}_6\text{St}_4^{\text{ref14}}$  in the  $\text{Cl}^-$  form (a) before, and (b) after immersion in 1 M KOH solution at 80 °C for 740 h.

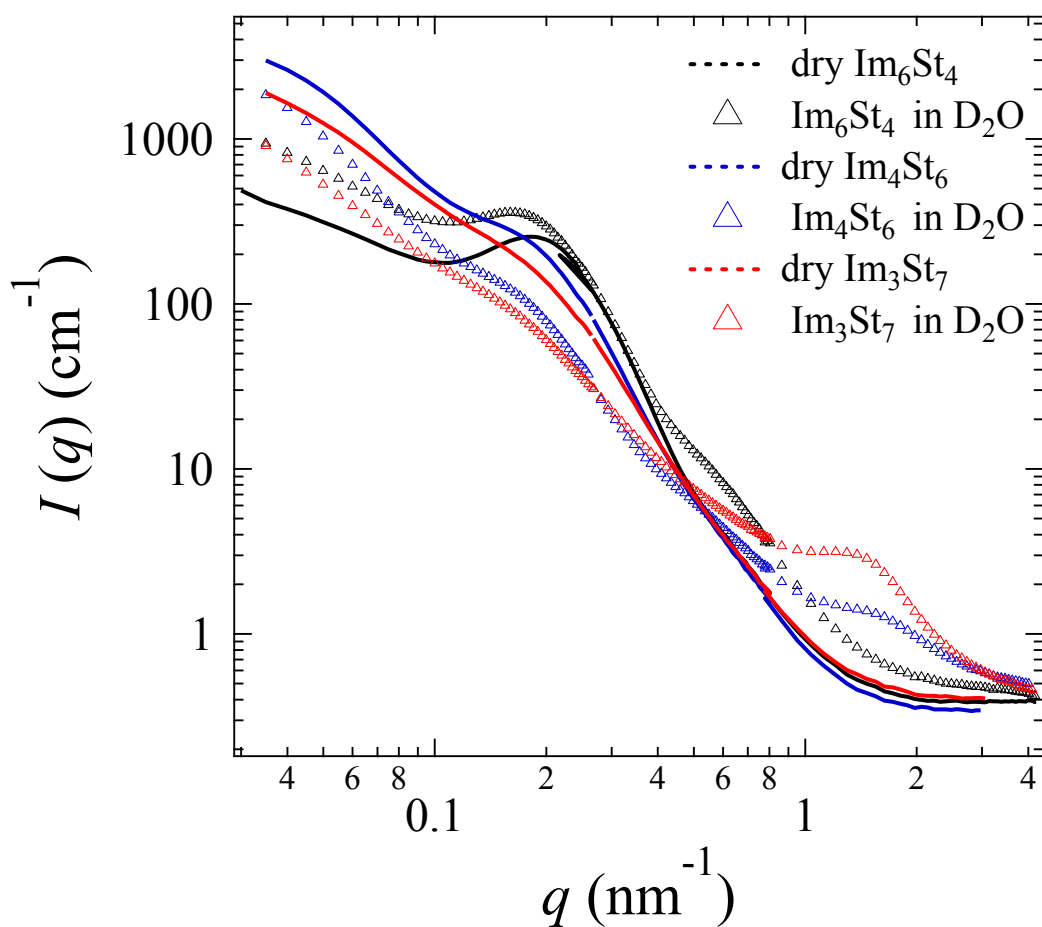

Figure S3 SANS intensity profiles of  $\text{Im}_6\text{St}_4$ -,  $\text{Im}_4\text{St}_6$ - and  $\text{Im}_3\text{St}_7$ -AEMs in the dry state and equilibrated in  $\text{D}_2\text{O}$  before incoherent scattering correction.

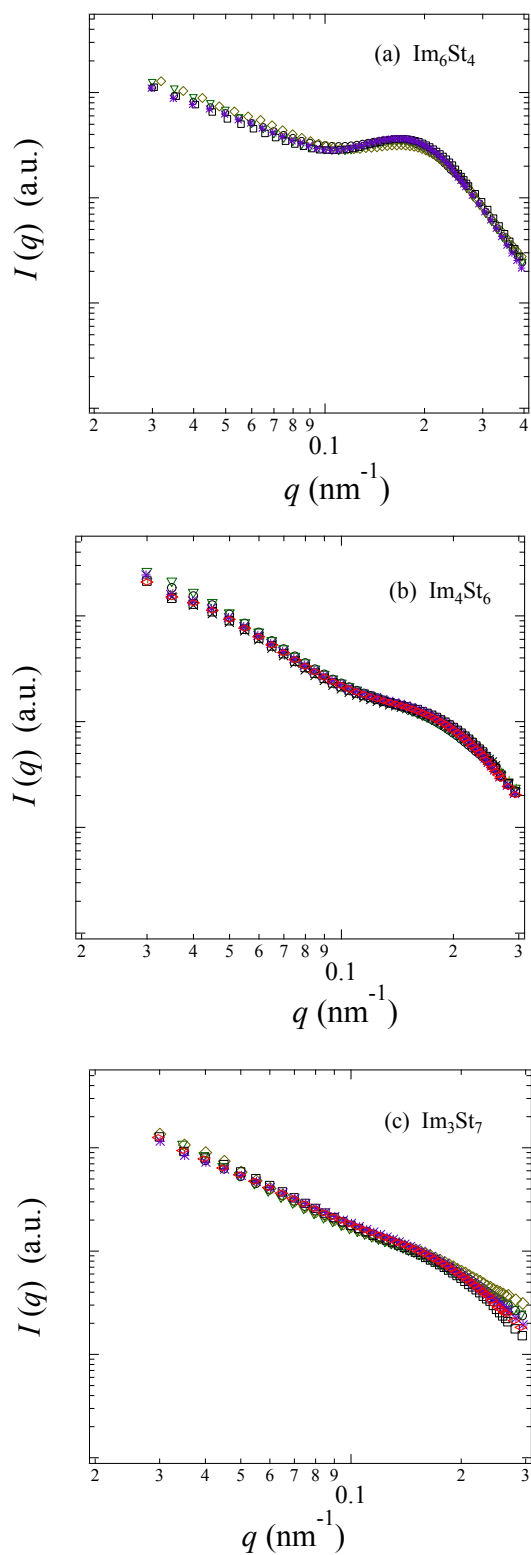

Figure S4 Normalization of  $I(q)$  profiles at around the first-order lamellar peaks in Region I for (a)  $\text{Im}_6\text{St}_4$ -, (b)  $\text{Im}_4\text{St}_6$ - and (c)  $\text{Im}_3\text{St}_7$ -AEMs, respectively.

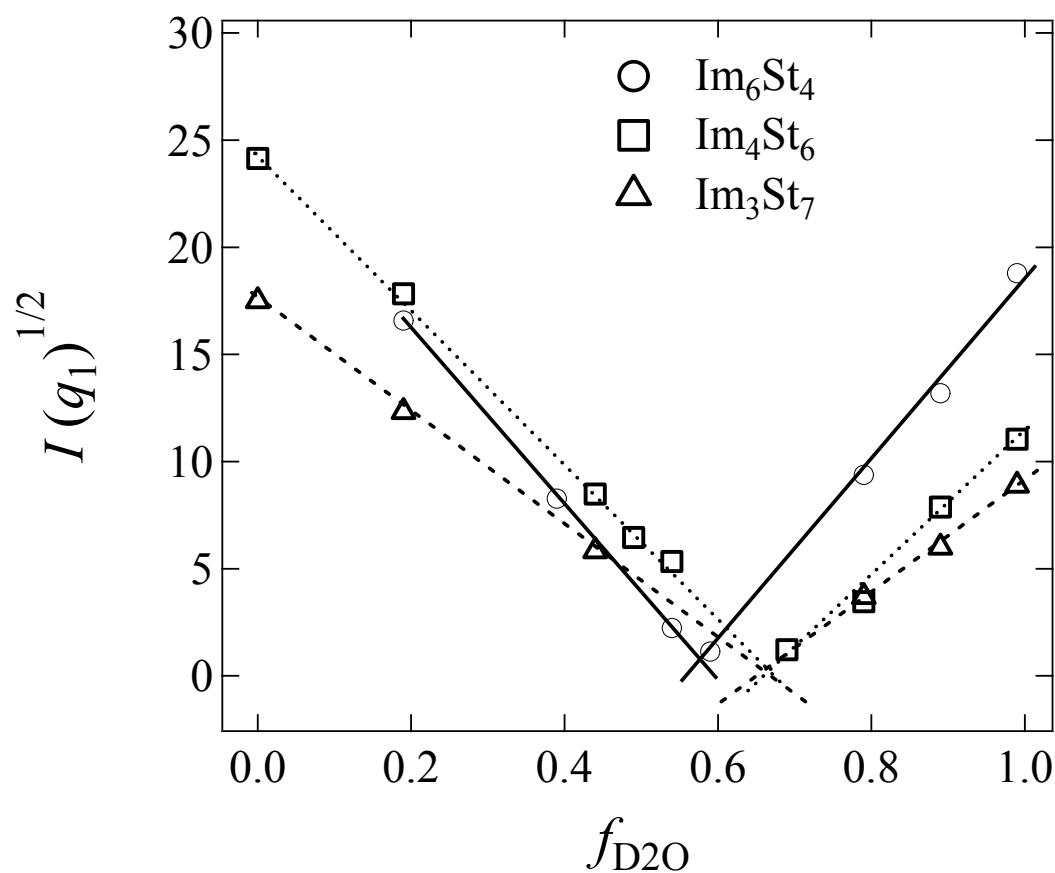

Figure S5 The volume fraction  $f_{D2O}$  dependence of  $I(q_1)^{1/2}$  observed for AEMs swollen in water mixtures shown in Figure 4.

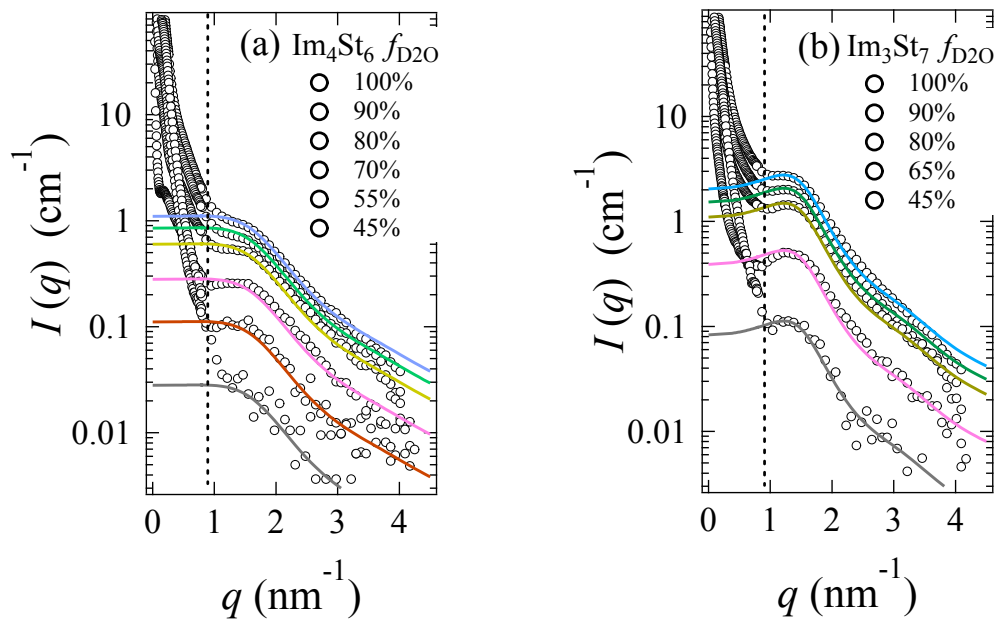

Figure S6  $I(0)_{\text{exp}}$  can be estimated by experimentally extrapolating the best-fitted lines to  $q \sim 0$  for all contrasts SANS profiles (symbols) obtained from (a)  $\text{Im}_4\text{St}_6$ -AEM and (b)  $\text{Im}_3\text{St}_7$ -AEM, respectively.



Table S1 WU and SR for AEMs in OH<sup>-</sup> form at 25 °C

| AEMs in OH <sup>-</sup> form    | Im/St | GD (%) | WU (%) | SR (%) |
|---------------------------------|-------|--------|--------|--------|
| Im <sub>6</sub> St <sub>4</sub> | 62/38 | 30     | 46     | 55     |
| Im <sub>4</sub> St <sub>6</sub> | 42/58 | 53     | 55     | 71     |
| Im <sub>3</sub> St <sub>7</sub> | 26/74 | 110    | 79     | 78     |

Table S2 Parameters used to fit SANS profiles of Im<sub>4</sub>St<sub>6</sub> and Im<sub>3</sub>St<sub>7</sub> membranes equilibrated in water mixtures by eq. (11)

| $f_{D2O}$<br>(%) | Im <sub>4</sub> St <sub>6</sub> |            |                |      | Im <sub>3</sub> St <sub>7</sub> |            |                |      |
|------------------|---------------------------------|------------|----------------|------|---------------------------------|------------|----------------|------|
|                  | $\phi_s$                        | $R_s$ (nm) | $\sigma_R/R_s$ | $K$  | $\phi_s$                        | $R_s$ (nm) | $\sigma_R/R_s$ | $K$  |
| 0                |                                 |            |                | 0.63 |                                 |            |                | 2.1  |
| 20               |                                 |            |                | 0.06 |                                 |            |                | 0.51 |
| 45               |                                 |            |                | 0.06 |                                 |            |                | 0.38 |
| 50               |                                 |            |                | 0.16 |                                 |            |                | -    |
| 55               | 0.12                            | 1.6        | 0.28           | 0.55 | 0.195                           | 2.0        | 0.26           | -    |
| 65               |                                 |            |                | -    |                                 |            |                | 1.79 |
| 70               |                                 |            |                | 0.59 |                                 |            |                | -    |
| 80               |                                 |            |                | 1.16 |                                 |            |                | 5.06 |
| 90               |                                 |            |                | 1.58 |                                 |            |                | 7.03 |
| 100              |                                 |            |                | 2.1  |                                 |            |                | 9.4  |
